# Supplementary material
Source: ML conference proceedings conference paper supplement (https://openreview.net/forum?id=GvMuB-YsiK6)
Supplement: supplementary_material [file attachment]

## A APPENDIX

### A.1 DATA DETAILS

Table A1: Details for each dataset.

| Task name                          | Samples | Description                                                                                                                                                                                                                                                                                                                                                                                                                                                                                                                                                                                                                                                                                                                                                                                                                                                                                                                                                                                                                              | Example                                                                                                                                                                                                                                 |
|------------------------------------|---------|------------------------------------------------------------------------------------------------------------------------------------------------------------------------------------------------------------------------------------------------------------------------------------------------------------------------------------------------------------------------------------------------------------------------------------------------------------------------------------------------------------------------------------------------------------------------------------------------------------------------------------------------------------------------------------------------------------------------------------------------------------------------------------------------------------------------------------------------------------------------------------------------------------------------------------------------------------------------------------------------------------------------------------------|-----------------------------------------------------------------------------------------------------------------------------------------------------------------------------------------------------------------------------------------|
| fibonacci_one                      | 10      | Given an input x, return the xth fibonacci number.                                                                                                                                                                                                                                                                                                                                                                                                                                                                                                                                                                                                                                                                                                                                                                                                                                                                                                                                                                                       | Given the input x is 8, the output f(x) is 21.\n\n                                                                                                                                                                                      |
| double_one                         | 10      | Given an input x, return 2*x.                                                                                                                                                                                                                                                                                                                                                                                                                                                                                                                                                                                                                                                                                                                                                                                                                                                                                                                                                                                                            | Given the input x is 6, the output f(x) is 12.\n\n                                                                                                                                                                                      |
| exp_one                            | 10      | Exponentiate the input to get the output.                                                                                                                                                                                                                                                                                                                                                                                                                                                                                                                                                                                                                                                                                                                                                                                                                                                                                                                                                                                                | Given the input x is 8, the output f(x) is 2980.96.\n\n                                                                                                                                                                                 |
| square_one                         | 10      | Square the input to get the output.                                                                                                                                                                                                                                                                                                                                                                                                                                                                                                                                                                                                                                                                                                                                                                                                                                                                                                                                                                                                      | Given the input x is 2, the output f(x) is 4.\n\n                                                                                                                                                                                       |
| first_two                          | 100     | Return the first of the inputs.                                                                                                                                                                                                                                                                                                                                                                                                                                                                                                                                                                                                                                                                                                                                                                                                                                                                                                                                                                                                          | Given the input numbers 7 and 8, the answer is 7.\n\n                                                                                                                                                                                   |
| add_two                            | 100     | Return the sum of the inputs.                                                                                                                                                                                                                                                                                                                                                                                                                                                                                                                                                                                                                                                                                                                                                                                                                                                                                                                                                                                                            | Given the input numbers 9 and 7, the answer is 16.\n\n                                                                                                                                                                                  |
| subtract_two                       | 100     | Return the difference of the inputs.                                                                                                                                                                                                                                                                                                                                                                                                                                                                                                                                                                                                                                                                                                                                                                                                                                                                                                                                                                                                     | Given the input numbers 5 and 4, the answer is 1.\n\n                                                                                                                                                                                   |
| divide_two                         | 100     | Return the quotient of the inputs.                                                                                                                                                                                                                                                                                                                                                                                                                                                                                                                                                                                                                                                                                                                                                                                                                                                                                                                                                                                                       | Given the input numbers 2 and 7, the answer is 2/7.\n\n                                                                                                                                                                                 |
| multiply_two                       | 100     | Return the product of the inputs.                                                                                                                                                                                                                                                                                                                                                                                                                                                                                                                                                                                                                                                                                                                                                                                                                                                                                                                                                                                                        | Given the input numbers 3 and 3, the answer is 9.\n\n                                                                                                                                                                                   |
| max_two                            | 100     | Return the maximum of the inputs.                                                                                                                                                                                                                                                                                                                                                                                                                                                                                                                                                                                                                                                                                                                                                                                                                                                                                                                                                                                                        | Given the input numbers 1 and 1, the answer is 1.\n\n                                                                                                                                                                                   |
| task1191_food_veg_nonveg           | 101     | Return whether the input food dish is vegetarian (yes or no).                                                                                                                                                                                                                                                                                                                                                                                                                                                                                                                                                                                                                                                                                                                                                                                                                                                                                                                                                                            | Input: Haq Maas Answer: no\n                                                                                                                                                                                                            |
| task1149_item_check_edible         | 119     | Return whether the input item is edible (yes or no).                                                                                                                                                                                                                                                                                                                                                                                                                                                                                                                                                                                                                                                                                                                                                                                                                                                                                                                                                                                     | Input: vase Answer: no\n                                                                                                                                                                                                                |
| task1146_country_capital           | 231     | In this task, you are given a country name and you need to return the capital city of the given country                                                                                                                                                                                                                                                                                                                                                                                                                                                                                                                                                                                                                                                                                                                                                                                                                                                                                                                                  | Input: Saint Pierre and Miquelon Answer: Saint-Pierre\n                                                                                                                                                                                 |
| task1147_country_currency          | 232     | You are given a country name and you need to return the currency of the given country.                                                                                                                                                                                                                                                                                                                                                                                                                                                                                                                                                                                                                                                                                                                                                                                                                                                                                                                                                   | Input: Senegal Answer: CFA Franc BCEAO\n                                                                                                                                                                                                |
| task1509_evaluation_antonyms       | 551     | In this task, you are given an adjective, and your job is to generate its antonym. An antonym of a word is a word opposite in meaning to it.                                                                                                                                                                                                                                                                                                                                                                                                                                                                                                                                                                                                                                                                                                                                                                                                                                                                                             | Input: paper Answer: scissor\n                                                                                                                                                                                                          |
| task183_rhyme_generation           | 999     | Given an input word generate a word that rhymes exactly with the input word. If not rhyme is found return "No"                                                                                                                                                                                                                                                                                                                                                                                                                                                                                                                                                                                                                                                                                                                                                                                                                                                                                                                           | Input: think Answer: sync\n                                                                                                                                                                                                             |
| task107_splash_question_to_sql     | 2031    | In this task you are expected to write an SQL query that will return the data asked for in the question. An SQL query works by selecting data from a table where certain conditions apply. A table contains columns where every row in that table must have a value for each column. Every table has a primary key that uniquely identifies each row, usually an id. To choose which columns are returned you specify that after the "SELECT" statement. Next, you use a "FROM" statement to specify what tables you want to select the data from. When you specify a table you can rename it with the "AS" statement. You can reference that table by whatever name follows the "AS" statement. If you want to select data from multiple tables you need to use the "JOIN" statement. This will join the tables together by pairing a row in one table with every row in the other table (Cartesian Product). To limit the number of rows returned you should use the "ON" statement. This will only return rows where the condition... | Input: What are the order ids and customer ids for orders that have been Cancelled, sorted by their order dates? Answer: SELECT order_id , customer_id FROM customer_orders WHERE order_status.code = "Cancelled" ORDER BY order_date\n |
| task088_identify_typo_verification | 6499    | The given sentence contains a typo which could be one of the following four types: (1) swapped letters of a word e.g. 'niec' is a typo of the word 'nice'. (2) missing letter in a word e.g. 'nic' is a typo of the word 'nice'. (3) extra letter in a word e.g. 'nicce' is a typo of the word 'nice'. (4) replaced letter in a word e.g. 'nicr' is a typo of the word 'nice'. You need to identify the typo in the given sentence. To do this, answer with the word containing the typo.                                                                                                                                                                                                                                                                                                                                                                                                                                                                                                                                                | Input: A laege display of apples, pears, and oranges Answer: laege\n                                                                                                                                                                    |
| task1336_gender_classifier         | 6500    | Return the gender of the person in the input sentence.                                                                                                                                                                                                                                                                                                                                                                                                                                                                                                                                                                                                                                                                                                                                                                                                                                                                                                                                                                                   | Input: Justin made me feel discouraged. Answer: M\n                                                                                                                                                                                     |
| task092_check_prime_classification | 6500    | In this task, you need to output 'Yes' if the given number is a prime number otherwise output 'No'. A 'prime number' is a whole number above 1 that can not be made by multiplying other whole numbers.                                                                                                                                                                                                                                                                                                                                                                                                                                                                                                                                                                                                                                                                                                                                                                                                                                  | Input: 9319 Answer: Yes\n                                                                                                                                                                                                               |

## A.2 IPROMPT EXPERIMENTS EXTENDED

Table A2: Examples of top-generated prompts for each method.

|                                                    | Human-written prompt                                                                                                                                                                                                                                                                                                                                                                                                                                                                    | AutoPrompt                                       | iPrompt                                 | Average suffix                         |
|----------------------------------------------------|-----------------------------------------------------------------------------------------------------------------------------------------------------------------------------------------------------------------------------------------------------------------------------------------------------------------------------------------------------------------------------------------------------------------------------------------------------------------------------------------|--------------------------------------------------|-----------------------------------------|----------------------------------------|
| identify typo verification                         | The given sentence contains a typo which could be one of the following four types: (1) swapped letters of a word e.g. 'nec' is a typo of the word 'nice'. (2) missing letter in a word e.g. 'nic' is a typo of the word 'nice'. (3) extra letter in a word e.g. 'nicce' is a typo of the word 'nice'. (4) replaced letter in a word e.g 'nicr' is a typo of the word 'nice'. You need to identify the typo in the given sentence. To do this, answer with the word containing the typo. | Sytheanathethethe                                | Given a string containing the alphabet  | the first word of the input            |
| check prime classification                         | In this task, you need to output 'Yes' if the given number is a prime number otherwise output 'No'. A 'prime number' is a whole number above 1 that can not be made by multiplying other whole numbers.                                                                                                                                                                                                                                                                                 | Abedin AnywaytheONSORED Roses 2050               | Yes or no? Is that                      | the input.\n\ni—endoftext—i            |
| splash question to sql                             | Generate an SQL statement from a question asking for certain data.                                                                                                                                                                                                                                                                                                                                                                                                                      | ributed grandfatherExceptionapropri intent Lara  | Write an SQL to produce output          | a string that records all              |
| country capital                                    | In this task, you are given a country name and you need to return the capital city of the given country                                                                                                                                                                                                                                                                                                                                                                                 | Bringingthethe Stargthethe                       | How did the economy perform in          | the name of the capital of             |
| country currency                                   | You are given a country name and you need to return the currency of the given country.                                                                                                                                                                                                                                                                                                                                                                                                  | renciesthethe Dmitrythemortg                     | Select currency code for a new          | the string representation of the input |
| item check edible                                  | Return whether the input item is edible (yes or no).                                                                                                                                                                                                                                                                                                                                                                                                                                    | joiningthe Brazil fuckingthethe                  | Would you like to buy a                 | "yes" or "no"                          |
| food veg non-veg                                   | Return whether the input food dish is vegetarian (yes or no).                                                                                                                                                                                                                                                                                                                                                                                                                           | Novthethethethe                                  | yes or no? This is                      | the input.\n\ni—endoftext—i            |
| peixian equity evaluation corpus gender classifier | Return the gender of the person in the input sentence.                                                                                                                                                                                                                                                                                                                                                                                                                                  | TurtheFortthetheReviewer                         | A B C D F#                              | a function that represents one         |
| evaluation antonyms                                | In this task, you are given an adjective, and your job is to generate its antonym. An antonym of a word is a word opposite in meaning to it.                                                                                                                                                                                                                                                                                                                                            | prevailingthethe weakestthe wins                 | What is the opposite of 1               | the first word of the input            |
| rhyme generation                                   | Given an input word generate a word that rhymes exactly with the input word. If not rhyme is found return "No"                                                                                                                                                                                                                                                                                                                                                                          | matethe dex championshipthethe                   | bale balbalbab                          | the first word of the input            |
| add two                                            | Return the sum of the inputs.                                                                                                                                                                                                                                                                                                                                                                                                                                                           | addedthe +the use worked                         | Write a function int add(               | the sum of the input numbers           |
| multiply two                                       | Return the product of the inputs.                                                                                                                                                                                                                                                                                                                                                                                                                                                       | multiplythethe the Multiple                      | When you multiply two (                 | the sum of the input numbers           |
| divide two                                         | Return the quotient of the inputs.                                                                                                                                                                                                                                                                                                                                                                                                                                                      | Kaplan MAG comprisingthe quarterly disproportion | n / N,where we                          | the result of the division.            |
| subtract two                                       | Return the difference of the inputs.                                                                                                                                                                                                                                                                                                                                                                                                                                                    | opposably exactly subtractFor YEAR               | If n < m then subtract                  | -1.\n\ni—endoftext—i                   |
| max two                                            | Return the maximum of the inputs.                                                                                                                                                                                                                                                                                                                                                                                                                                                       | NumberthetheJusticeJaDefault                     | Which number has a bigger value         | the sum of the input numbers           |
| first two                                          | Return the first of the inputs.                                                                                                                                                                                                                                                                                                                                                                                                                                                         | greater name sorting indiscrim to numbers        | The first digit of both values          | the sum of the input numbers           |
| square one                                         | Square the input to get the output.                                                                                                                                                                                                                                                                                                                                                                                                                                                     | multiplythe hypot Norththeirl                    | Write a function that calculates square | f(x).\n\n                              |
| exp one                                            | Exponentiate the input to get the output.                                                                                                                                                                                                                                                                                                                                                                                                                                               | Smythe webpage fle clin McA                      | Use BigInteger and double (             | f(x).\n\n                              |
| double one                                         | Given an input x, return 2*x.                                                                                                                                                                                                                                                                                                                                                                                                                                                           | ADDthe introducedpareat contraceptives           | write a function called double that     | f(x).\n\n                              |
| fibonacci one                                      | Given an input x, return the xth fibonacci number.                                                                                                                                                                                                                                                                                                                                                                                                                                      | betweenthe made one uped                         | how to prove an algorithm correctness   | f(x).\n\n                              |

Table A3: Models analyzed here.

| Model name     | Huggingface identifier        | Citation                  |
|----------------|-------------------------------|---------------------------|
| GPT-2 (1.5B)   | gpt2-xl                       | Radford et al. (2019)     |
| OPT (2.7B)     | facebook/opt-2.7b             | Zhang et al. (2022)       |
| GPT-Neo (2.7B) | EleutherAI/gpt-neo-2.7B       | Black et al. (2021)       |
| GPT-J (6B)     | EleutherAI/gpt-j-6B           | Wang & Komatsuzaki (2021) |
| OPT (6.7B)     | facebook/opt-6.7b             | Zhang et al. (2022)       |
| GPT-Neo (20B)  | EleutherAI/gpt-neox-20b       | Black et al. (2022)       |
| GPT-3 (175B)   | OpenAI API (text-davinci-002) | Radford et al. (2021)     |

### A.3 EXPERIMENTAL DETAILS EXTENDED

#### A.3.1 HYPERPARAMETERS FOR AUTOPROMPTING

This subsection discusses the hyperparameters set for prompts generated on Math, NLI, and sentiment tasks. For Math and NLI tasks we considered prompts of length 6 tokens; for sentiment we considered prompts of length 16. For all experiments with iPrompt we consider 8 candidate explanations for each step and generate 4 new generations per candidate, for a total of 32 candidates. For fair comparison, we consider 32 candidates per step for AutoPrompt. We generate Math and NLI from 5,000 training steps and Sentiment candidates from 10,000 steps. We truncate examples to a maximum of 128 tokens. We measure loss for re-ranking (used by both AutoPrompt and iPrompt) using the LLM’s loss over the full space of output tokens, i.e. we do not restrict the vocabulary to the space of label tokens for classification problems.

#### A.4 DETAILS OF IPROMPT

Here we explicate the details of iPrompt. At each step, we consider a fixed number of mutations for each example in the population, as well as an additional number of random generations to prevent the population from getting stuck in a local minimum. When we sample a new population, we sample the best-performing prompts seen so far, as measured by a running average zero-shot loss. In order to encourage diverse candidate prompts, sample a population such that each sample starts with a different token. During preliminary experiments, we found that enforcing different starting tokens for each candidate prompt helped promote more diverse and interpretable prefixes.

For generation, we sample directly from the LLM given the data concatenated with the string `nPrompt: .` We sample with a temperature of 1 and do not use a sampling strategy like nucleus sampling. For Math and NLI, we set the “repetition penalty” for generations to 2.0 to discourage copying from the training set. For the sentiment experiment, we reduce the repetition penalty to 1.0.

##### A.4.1 DETAILS OF AUTOPROMPT

We note several changes to AutoPrompt that were not mentioned in the original paper but present in the original codebase, and proved crucial in our implementation.

First, if we compute the top-candidates over every position, the magnitude of the gradient will always be highest at position 0, and thus AutoPrompt will prefer to make a swap at that position every time. To fix this issue, at each training step, we randomly select a position of the token to edit and consider word swaps only at that position.

Second, as described, AutoPrompt will always take one of the candidate substitutions, even when said candidate does not improve the loss compared to the current prefix. Instead, we only make a substitution if the candidate prefix loss is lower than the loss on the same batch computed with the current prefix.

Finally, *unlike* the AutoPrompt implementation found online, we allow AutoPrompt to select from any token to substitute, including special tokens and non-English characters.

To make AutoPrompt compatible with ranking-based metrics, we store the losses for each candidate ranked during training. At the end, we consider the “top prefix” to be the prefix with the lowest average loss during training, that has been considered at least three times. This final consideration

criteria prevents candidates from the very end of training that only have a few loss estimates from being counted as the top prefix.

#### A.5 fMRI EXPERIMENT DETAILS

This section gives more details on the fMRI experiment analyzed in Sec. 5; for more scientific details see the original study (Huth et al., 2016) and code ([github.com/HuthLab/speechmodeltutorial](https://github.com/HuthLab/speechmodeltutorial)). Sec. 5 analyzes data from one human subject in the original study, as the subject listened to approximately two hours of narrative speech from the Moth Radio Hour, which consists of short autobiographical stories. The subject underwent fMRI scanning as they listened, yielding an fMRI volume brain scan consisting of tens of thousands of voxels roughly every two seconds.

The individual voxel models described in Sec. 5 are each fit to 3,737 training points, each corresponding to a different time point (after accounting for various preprocessing steps, such as trimming the beginning and end of the sequence). They are evaluated on 291 training volumes which come from a 10-minute story that was not seen during training.

Fig. A1 shows the generalization performance of the model for each voxel, measured by the correlation between the predicted response and the measured response. Some regions are very poorly predicted (black), but many voxels can be predicted quite well (bright).

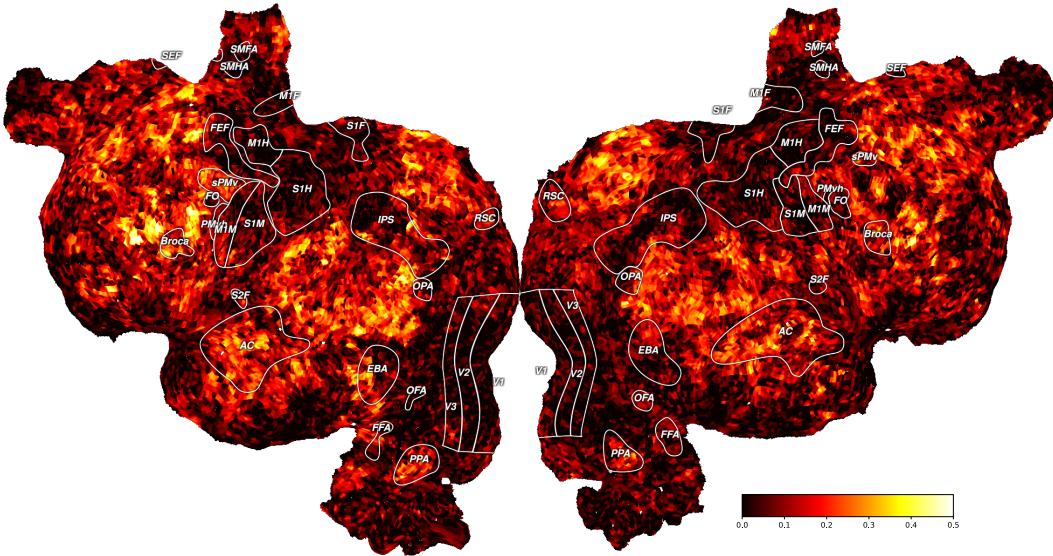

Figure A1: Generalization performance for individual-voxel models, measured by correlation between the prediction and the measured response.

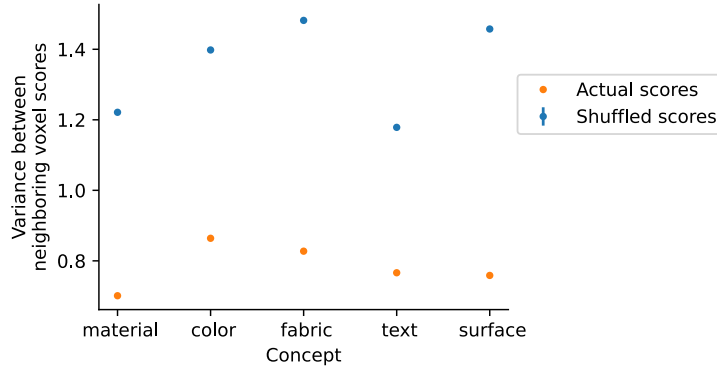

Figure A2: Concepts are spatially localized in the brain maps: the variance between neighboring voxels is considerably lower than would be expected from shuffling the voxel values. Note that we take care to shuffle the map values only within the 10,000 top-predicted voxels, ignoring the poorly predicted voxels. Error bars (within the points) are standard errors of the mean.

#### A.6 ADDITIONAL SENTIMENT RESULTS

Table A4 shows the best prompt produced by each method for each sentiment dataset. iPrompt often learns to recreate significant examples from the dataset, as a prompt. Figure A3 shows loss across training step for each method and dataset, across three random seeds. We see that iPrompt manages to find a better prompt for all datasets except IMDB, and often stops well short of the 10,000 maximum training steps (if it does not find a better prompt for 100 steps). Each training step represents a single word swap (in the case of AutoPrompt) or the truncation and generation of a new prefix (in the case of iPrompt).

Table A4: Best-of-three prompts generated by each method on sentiment classification datasets.

| Task                 | Method               | Prompt                                                                                      |
|----------------------|----------------------|---------------------------------------------------------------------------------------------|
| Financial phrasebank | AutoPrompt           | Maybeiago EUR Vimaterasu estab dimeye dignaterasu? Lair EURaterasu Tol calc                 |
|                      | Human-written prompt | Answer Yes for positive, No for negative, and Maybe for neutral.                            |
|                      | No prompt            |                                                                                             |
|                      | iPrompt              | Budapest. Answer: Maybe (1) - The parent company is a big German                            |
| IMDB                 | AutoPrompt           | Noamphetamine revealed oxidative Yesmone poker NoTrivia bands morphology [ despite No ex No |
|                      | Human-written prompt | Answer Yes if the input is positive and No if the input is negative.                        |
|                      | No prompt            |                                                                                             |
|                      | iPrompt              | This was filmed back-to-back with the 1992 re-make of Conan                                 |
| Rotten Tomatoes      | AutoPrompt           | osuke Medals; does CFR Sab"]=¿ NormalConstructed Umbunit satisfy Good· ram                  |
|                      | Human-written prompt | Answer Yes if the input is positive and No if the input is negative.                        |
|                      | No prompt            |                                                                                             |
|                      | iPrompt              | a fast, funny, highly enjoyable film. Answer: Yes 3.1/                                      |
| SST-2                | AutoPrompt           | RALauntletICEidatedWhetherBF Holy Kubrick incorporatedherent#\$ Not==-- SPECIAL Pyth        |
|                      | Human-written prompt | Answer Yes if the input is positive and No if the input is negative.                        |
|                      | No prompt            |                                                                                             |
|                      | iPrompt              | life Answer: Yes (because it's about life) This                                             |

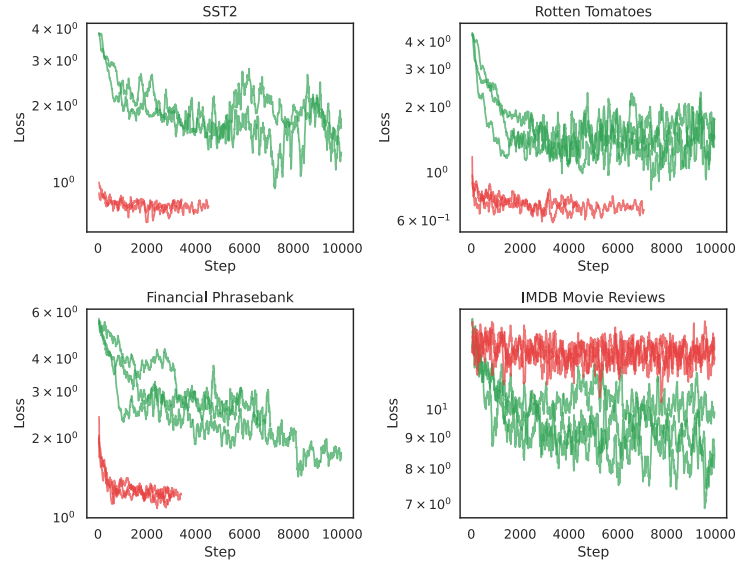

Figure A3: Loss plots for methods across sentiment analysis datasets, showing AutoPrompt (green) and iPrompt (red) across three random seeds.
